# Supplementary material for: Loss of TRIM21 alleviates cardiotoxicity by suppressing ferroptosis induced by the chemotherapeutic agent doxorubicin
Source: PubMed Central journal article supplement — eBioMedicine. 2021 Jul 4;69:103456. doi: 10.1016/j.ebiom.2021.103456 (PMC8261003; doi:10.1016/j.ebiom.2021.103456), 2021-07-04
Supplement: mmc2.pdf [file mmc2.pdf]

## Product datasheet

# Anti-4 Hydroxynonenal antibody ab46545

★★★★★ 21 Abreviews 327 References 1 图像

### 概述

|       |                                              |
|-------|----------------------------------------------|
| 产品名称  | Anti-4 Hydroxynonenal抗体                      |
| 描述    | 兔多克隆抗体to 4 Hydroxynonenal                    |
| 宿主    | Rabbit                                       |
| 特异性   | Specifically binds to HNE modified proteins. |
| 经测试应用 | 适用于: WB, ELISA                               |
| 种属反应性 | 与反应: Species independent                     |
| 免疫原   | HNE conjugated to BC.                        |
| 常规说明  |                                              |

The Life Science industry has been in the grips of a reproducibility crisis for a number of years. Abcam is leading the way in addressing this with our range of recombinant monoclonal antibodies and knockout edited cell lines for gold-standard validation. Please check that this product meets your needs before purchasing.

If you have any questions, special requirements or concerns, please send us an inquiry and/or contact our Support team ahead of purchase. Recommended alternatives for this product can be found below, along with publications, customer reviews and Q&As

### 性能

|      |                                                                                                                                              |
|------|----------------------------------------------------------------------------------------------------------------------------------------------|
| 形式   | Liquid                                                                                                                                       |
| 存放说明 | Shipped at 4°C. Store at +4°C short term (1-2 weeks). Upon delivery aliquot. Store at -20°C long term. Avoid freeze / thaw cycle.            |
| 存储溶液 | pH: 7.20<br>Preservative: 0.02% Sodium azide<br>Constituents: PBS, 0.0146% EDTA, 0.44% Sodium chloride, 50% Glycerol, 1.23% Sodium phosphate |
| 纯化说明 | This antibody was purified by an HNE modified Protein-Sepharose affinity column.                                                             |
| 克隆   | 多克隆                                                                                                                                          |
| 同种型  | IgG                                                                                                                                          |

### 应用

“应用说明”部分 下显示的仅为推荐的起始稀释度;实际最佳的稀释度/浓度应由使用者检定。

| 应用    | Ab评论      | 说明                                                                                                                                     |
|-------|-----------|----------------------------------------------------------------------------------------------------------------------------------------|
| WB    | ★★★★☆ (9) | Use at an assay dependent concentration. Can be blocked with <a href="#">Hydroxynonenal modified Bovine Serum Albumin (ab194193)</a> . |
| ELISA |           | 1/4000 - 1/20000.                                                                                                                      |

## 靶标

**相关性** Aldehydic products of lipid peroxidation, such as 4 hydroxynonenal (4 HNE), have been implicated in the etiology of pathological changes under oxidative stress as a key mediator of oxidative stress induced cell death. It is a stable product of lipid peroxidation, is proarrhythmic and may contribute to the cytotoxic effects of oxidative stress.

**细胞定位** Cytoplasmic

## 图片

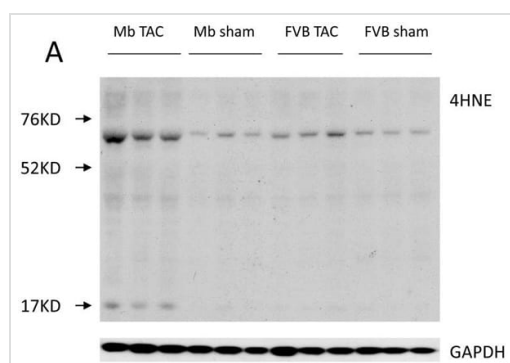

Western blot - Anti-4 Hydroxynonenal antibody (ab46545)

Image from Wang J et al., PLoS One. 2013;8(1):e53951. Fig 7(A).; doi: 10.1371/journal.pone.0053951. Reproduced under the Creative Commons license <http://creativecommons.org/licenses/by/4.0/>

Frozen mouse cardiac tissue was homogenized with lysis buffer containing 50 mmol/L Tris-HCl (pH7.5), 5 mmol/L EDTA, 10 mmol/L EGTA, 1X cock tail protease inhibitor, 1X alkaline phosphatase inhibitor and 1X acid phosphatase inhibitor, 50 ug/ml phenylmethylsulfonyl fluoride and 1.23 mg/ml Chaps. Extracts were centrifuged at 12,000 rpm at 4°C for 15 minutes. 10 ug of the sample proteins was mixed with loading buffer (40 mmol/L Tris-HCl, pH 6.8, 1% SDS, 50 mmol/L DTT, 7.5% glycerol and 0.003% bromophenol blue and heated at 95°C for 5 minutes, and subjected to electrophoresis on a gradient gel (4% to 12%) at 120V. After electrophoresis, the protein was transferred to a PVDF membrane in a transfer buffer. The PVDF membrane was rinsed briefly in TBS buffer containing 50 mM Tris, 137 mM NaCl, pH 7.5 and blocked in buffer (5% milk with 0.5% BSA in TBST buffer (TBS buffer containing 0.1% tween 20) at room temperature for 1 hour. The membrane was then incubated with rabbit anti 4-hydroxy-2-nonenal (4HNE) antibody at 1/3000 dilution at 4°C over night, followed by washing three times. The secondary antibody was incubated with the membrane for another one hour at room temperature. Finally the antigen-antibody complexes were visualized with use of an enhanced chemiluminescence kit. Anti-GAPDH (Abcam) was used for normalizing.

**Please note:** All products are "FOR RESEARCH USE ONLY. NOT FOR USE IN DIAGNOSTIC PROCEDURES"

### **Our Abpromise to you: Quality guaranteed and expert technical support**

---

- Replacement or refund for products not performing as stated on the datasheet
- Valid for 12 months from date of delivery
- Response to your inquiry within 24 hours
  
- We provide support in Chinese, English, French, German, Japanese and Spanish
- Extensive multi-media technical resources to help you
- We investigate all quality concerns to ensure our products perform to the highest standards

If the product does not perform as described on this datasheet, we will offer a refund or replacement. For full details of the Abpromise, please visit <https://www.abcam.cn/abpromise> or contact our technical team.

### **Terms and conditions**

---

- Guarantee only valid for products bought direct from Abcam or one of our authorized distributors
