# Supplementary material for: Loss of TRIM21 alleviates cardiotoxicity by suppressing ferroptosis induced by the chemotherapeutic agent doxorubicin
Source: PubMed Central journal article supplement — eBioMedicine. 2021 Jul 4;69:103456. doi: 10.1016/j.ebiom.2021.103456 (PMC8261003; doi:10.1016/j.ebiom.2021.103456), 2021-07-04
Supplement: mmc3.pdf [file mmc3.pdf]

**BFB**

BIOLOGICAL RESEARCH

产品质量检测

货号: BFN60808678

批号: 210B530051

细胞名称: 人心肌细胞AC16

培养体系: 90%DMEM+10%FBS+1%三抗

| Test                                                                     | Specifications         | Results                |
|--------------------------------------------------------------------------|------------------------|------------------------|
| 冻存活性测试                                                                   | ≥ 50.0%                | 85.2%                  |
| 复苏活性测试                                                                   | ≥ 90.0%                | 98.6%                  |
| 生长状态                                                                     | 贴壁                     | 贴壁                     |
| 形态                                                                       | 不规则                    | 不规则                    |
| 种属                                                                       | 人                      | 人                      |
| 支原体                                                                      | (-)                    | (-)                    |
| 外源污染                                                                     | (-)                    | (-)                    |
| STR                                                                      | ATCC/DSMZ              | 通过验证                   |
| 无菌验证<br>iAST bottle (aerobic) at 32°C iNST<br>bottle (anaerobic) at 32°C | No growth<br>No growth | No growth<br>No growth |

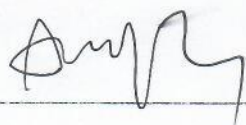

 2020  
Date

BFB (China)

Shanghai, China

Tel : 400-656-0232

E-mail : cellsupport@bluefcell.com
