# Supplementary material for: Loss of TRIM21 alleviates cardiotoxicity by suppressing ferroptosis induced by the chemotherapeutic agent doxorubicin
Source: PubMed Central journal article supplement — eBioMedicine. 2021 Jul 4;69:103456. doi: 10.1016/j.ebiom.2021.103456 (PMC8261003; doi:10.1016/j.ebiom.2021.103456), 2021-07-04
Supplement: mmc4.pdf [file mmc4.pdf]

### Report of Cell Line STR (short tandem repeat)

Experimental method: Extract DNA from samples with genome extraction kit (Axygen) .Amplificat DNA (locus in human DNA :D4S2408)

Detect genetic locus by genetic analyzer(ABI 3730XL).

#### 1 Experimental result

##### Genotype Test Results

| Sample NO. | Multiple Alleles | Non - human<br>Source<br>Pollution | Matched Cell Line |
|------------|------------------|------------------------------------|-------------------|
| 01         | (-)              | (-)                                | AC16              |

#### 2 STR Typing Result

| Marker  | STR Profile(sample 01)                                                              |         |         |         | STR Profile(Millipore) |         |         |
|---------|-------------------------------------------------------------------------------------|---------|---------|---------|------------------------|---------|---------|
|         | Allele1                                                                             | Allele2 | Allele3 | Allele4 | Allele1                | Allele2 | Allele3 |
| D5S818  | 9                                                                                   | 11      |         |         | 9                      | 11      |         |
|         | 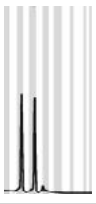  |         |         |         |                        |         |         |
| D13S317 | 12                                                                                  | 13      |         |         | 12                     | 13      |         |
|         |  |         |         |         |                        |         |         |
| D7S820  | 10                                                                                  | 11      | 12      |         | 10                     | 11      | 12      |
|         |  |         |         |         |                        |         |         |
| D16S539 | 11                                                                                  | 13      |         |         | 11                     | 13      |         |
|         |  |         |         |         |                        |         |         |
| vWA     | 16                                                                                  | 18      |         |         | 16                     | 18      |         |
|         |  |         |         |         |                        |         |         |

|        |                                                                                     |    |     |  |    |    |     |
|--------|-------------------------------------------------------------------------------------|----|-----|--|----|----|-----|
|        |    |    |     |  |    |    |     |
| TH01   | 7                                                                                   | 8  | 9.3 |  | 7  | 8  | 9.3 |
|        |    |    |     |  |    |    |     |
| AMEL   | X                                                                                   | X  |     |  | X  | X  |     |
|        |    |    |     |  |    |    |     |
| TPOX   | 11                                                                                  | 11 |     |  | 11 | 11 |     |
|        |   |    |     |  |    |    |     |
| CSF1PO | 9                                                                                   | 11 | 12  |  | 9  | 11 | 12  |
|        |  |    |     |  |    |    |     |

### 3 Programme

|   | Programme1 | Programme2 | Programme3 | Programme4 | Programme5 | Programme6 |
|---|------------|------------|------------|------------|------------|------------|
| 1 | TH01       | AMEL       | TPOX       | D3S1358    | PENTAE     | D19S433    |
| 2 | D12S319    | D5S818     | vWA        | D13S317    |            | PENTAD     |
| 3 | D7S820     | D2S1338    | D8S1179    | D6S1043    |            |            |
| 4 | CSF1PO     | D21S11     |            | D16S539    |            |            |
| 5 | FGA        | D18S51     |            |            |            |            |

Laboratory Technician: Xin Wang

Review Member: Muyi Yang
