# Supplementary material for: Loss of TRIM21 alleviates cardiotoxicity by suppressing ferroptosis induced by the chemotherapeutic agent doxorubicin
Source: PubMed Central journal article supplement — eBioMedicine. 2021 Jul 4;69:103456. doi: 10.1016/j.ebiom.2021.103456 (PMC8261003; doi:10.1016/j.ebiom.2021.103456), 2021-07-04
Supplement: mmc6.pdf [file mmc6.pdf]

For Research Use Only

# Caspase 3/p17/p19 Polyclonal antibody

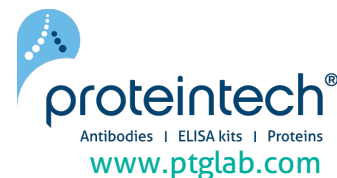

Catalog Number: 19677-1-AP

Featured Product

952 Publications

## Basic Information

### Catalog Number:

19677-1-AP

### Size:

150ul, Concentration: 600 µg/ml by Nanodrop and 273 µg/ml by Bradford method using BSA as the standard;

### Source:

Rabbit

### Isotype:

IgG

### GenBank Accession Number:

NM\_004346

### GeneID (NCBI):

836

### Full Name:

caspase 3, apoptosis-related cysteine peptidase

### Calculated MW:

32 kDa

### Observed MW:

32-35 kDa, 17 kDa, 19 kDa

### Purification Method:

Antigen affinity purification

### Recommended Dilutions:

WB 1:500-1:2000

IP 0.5-4.0 ug for IP and 1:200-1:1000 for WB

IHC 1:50-1:500

IF 1:50-1:500

## Applications

### Tested Applications:

FC, IF, IHC, IP, WB, ELISA

### Cited Applications:

ELISA, IF, IHC, RIP, WB

### Species Specificity:

human, mouse, rat

### Cited Species:

Astragalus membranaceus, Bovine, chicken, duck, Goat, hamster, human, monkey, mouse, pig

**Note-IHC: suggested antigen retrieval with TE buffer pH 9.0; (\*) Alternatively, antigen retrieval may be performed with citrate buffer pH 6.0**

### Positive Controls:

**WB:** Jurkat cells, mouse spleen tissue, HeLa cells, rat brain tissue, rat liver tissue

**IP:** NIH/3T3 cells,

**IHC:** mouse brain tissue, human teeth tissue, human spleen tissue, human kidney tissue

**IF:** NIH/3T3 cells, mouse brain tissue, HeLa cells

## Background Information

Caspases, a family of endoproteases, are critical players in cell regulatory networks controlling inflammation and cell death. Initiator caspases (caspase-2, -8, -9, -10, -11, and -12) cleave and activate downstream effector caspases (caspase-3, -6, and -7), which in turn execute apoptosis by cleaving targeted cellular proteins. Caspase 3 (also named CPP32, SCA-1, and Apopain) proteolytically cleaves poly(ADP-ribose) polymerase (PARP) at the beginning of apoptosis. Caspase 3 plays a key role in the activation of sterol regulatory element binding proteins (SREBPs) between the basic helix-loop-helix leucine zipper domain and the membrane attachment domain. Caspase 3 can also form heterocomplex with other proteins and performs the molecular mass of 50-70 kDa. This antibody can recognize p17, p19 and p32 of Caspase 3.

## Notable Publications

| Author     | Pubmed ID | Journal              | Application |
|------------|-----------|----------------------|-------------|
| Tong Li    | 33152931  | Biomed Pharmacother  | WB          |
| Xinxin Yan | 27684494  | J Biomed Mater Res A | WB          |
| Lei Liu    | 30273566  | Chem Biol Interact   | WB          |

## Storage

### Storage:

Store at -20°C. Stable for one year after shipment.

### Storage Buffer:

PBS with 0.02% sodium azide and 50% glycerol pH 7.3.

Aliquoting is unnecessary for -20°C storage

For technical support and original validation data for this product please contact:

T: 1 (888) 4PTGLAB (1-888-478-4522) (toll free in USA), or 1(312) 455-8498 (outside USA)

E: proteintech@ptglab.com  
W: ptglab.com

**This product is exclusively available under Proteintech Group brand and is not available to purchase from any other manufacturer.**

## Selected Validation Data

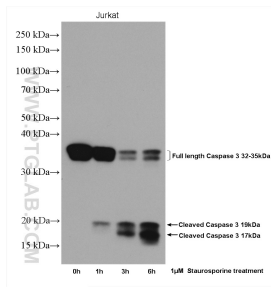

Untreated and Staurosporine treated Jurkat cells were subjected to SDS PAGE followed by western blot with 19677-1-AP (Caspase 3 antibody) at dilution of 1:500 incubated at room temperature for 1.5 hours.

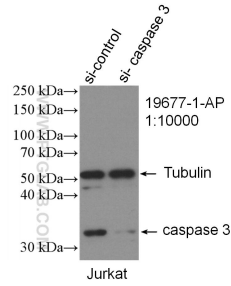

WB result of Caspase 3 antibody (19677-1-AP; 1:10000; incubated at room temperature for 1.5 hours) with sh-Control and sh-Caspase 3 transfected Jurkat cells.

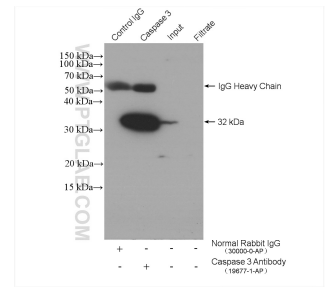

IP result of anti-Caspase 3 (IP:19677-1-AP, 4ug; Detection:19677-1-AP 1:300) with NIH/3T3 cells lysate 3440 ug.

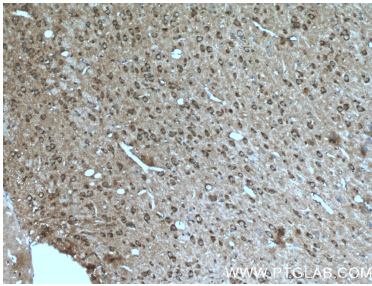

Immunohistochemical analysis of paraffin-embedded mouse brain tissue slide using 19677-1-AP (Caspase 3 antibody) at dilution of 1:200 (under 10x lens. Heat mediated antigen retrieval with Tris-EDTA buffer (pH 9.0).

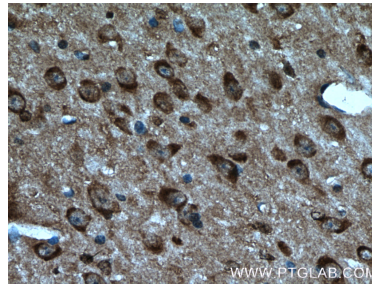

Immunohistochemical analysis of paraffin-embedded mouse brain tissue slide using 19677-1-AP (Caspase 3 antibody) at dilution of 1:200 (under 40x lens. Heat mediated antigen retrieval with Tris-EDTA buffer (pH 9.0).

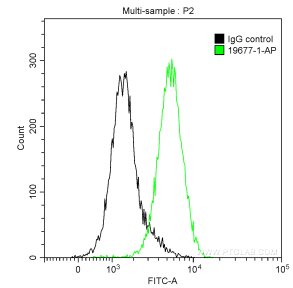

$1 \times 10^6$  HepG2 cells were intracellularly stained with 0.2 ug Anti-Human Caspase 3/p17/p19 (19677-1-AP) and CoraLite@488-Conjugated AffiniPure Goat Anti-Rabbit IgG(H+L) at dilution 1:1000 (green), and 0.2 ug Control Antibody. Cells were fixed with 90% MeOH.

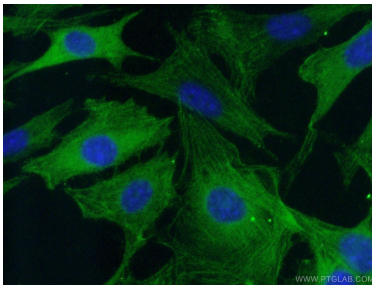

Immunofluorescent analysis of (-20 Ethanol) fixed NIH/3T3 cells using 19677-1-AP (Caspase 3 antibody) at dilution of 1:50 and Alexa Fluor 488-conjugated AffiniPure Goat Anti-Rabbit IgG(H+L).
