# Supplementary material for: Loss of TRIM21 alleviates cardiotoxicity by suppressing ferroptosis induced by the chemotherapeutic agent doxorubicin
Source: PubMed Central journal article supplement — eBioMedicine. 2021 Jul 4;69:103456. doi: 10.1016/j.ebiom.2021.103456 (PMC8261003; doi:10.1016/j.ebiom.2021.103456), 2021-07-04
Supplement: mmc7.pdf [file mmc7.pdf]

---

**From:** Ozato, Keiko (NIH/NICHD) [E]  
**Sent:** Wednesday, January 27, 2016 3:00 AM  
**To:** Wei-Xing Zong  
**Subject:** RE: Editor's Decision on MOLECULAR-CELL-D-15-01545R1

Dear Dr. Zong, I am very impressed with your revised manuscript that shows a novel, redox regulatory role for TRIM21. I thank you for including me as a co-author of the paper. I have made a few editorial changes in the manuscript, as attached (no substantive change).

I hope your final revision will be promptly accepted.

Keiko Ozato

-----Original Message-----

From: Wei-Xing Zong [<mailto:weixing.zong@pharmacy.rutgers.edu>]  
Sent: Monday, January 25, 2016 10:44 PM  
To: Ozato, Keiko (NIH/NICHD) [E]  
Subject: Fwd: Editor's Decision on MOLECULAR-CELL-D-15-01545R1

Dear Dr. Ozato,

Our paper on p62 ubiquitylation is near acceptance at Mol Cell. I will soon submit a revision after addressing Reviewer 1's remaining concerns, and editing the ms to conform to the journal guideline. Please take this chance to look at the ms to see whether you have important edits (especially author names and affiliations) to make. Please note that we are already way over the journal limit for word counts so can only accommodate essential changes.

All the best!

Wei-Xing

Wei-Xing Zong, Ph.D.  
Professor  
Department of Chemical Biology  
Room 215  
Ernest Mario School of Pharmacy  
Rutgers University  
164 Frelinghuysen Road  
Piscataway, NJ 08854  
Tel: 848-445-4940 (Office); 848-445-8003 (Lab)  
email: weixing.zong@pharmacy.rutgers.edu

----- Forwarded Message -----

From: "Molecular Cell Editorial Office" <[em@editorialmanager.com](mailto:em@editorialmanager.com)>  
To: "Wei-Xing Zong" <[weixing.zong@pharmacy.rutgers.edu](mailto:weixing.zong@pharmacy.rutgers.edu)>  
Sent: Monday, January 25, 2016 3:01:08 PM  
Subject: Editor's Decision on MOLECULAR-CELL-D-15-01545R1
