# Supplementary material for: Loss of TRIM21 alleviates cardiotoxicity by suppressing ferroptosis induced by the chemotherapeutic agent doxorubicin
Source: PubMed Central journal article supplement — eBioMedicine. 2021 Jul 4;69:103456. doi: 10.1016/j.ebiom.2021.103456 (PMC8261003; doi:10.1016/j.ebiom.2021.103456), 2021-07-04
Supplement: mmc9.pdf [file mmc9.pdf]

## H9c2(2-1) 大鼠心肌细胞

### 使用说明书

|                            |                                                                                                                                                                                                                                                                                                                                                                                               |
|----------------------------|-----------------------------------------------------------------------------------------------------------------------------------------------------------------------------------------------------------------------------------------------------------------------------------------------------------------------------------------------------------------------------------------------|
| 细胞名称<br>Cell name          | H9c2(2-1) 大鼠心肌细胞                                                                                                                                                                                                                                                                                                                                                                              |
| 货号<br>NO.                  | ZQ0102                                                                                                                                                                                                                                                                                                                                                                                        |
| 描述<br>Description          | B.Kimes and B.Brandt 从源于 BD1X 大鼠胚胎心脏组织的克隆细胞株亚克隆了 H9c2(2-1) 细胞株。它表现许多骨骼肌的特性。这个细胞株中的成肌细胞能融合形成多核的肌管，并对乙酰胆碱的刺激发生反应。如果培养基中的血清浓度下降到 1%，融合发生得很快。                                                                                                                                                                                                                                                     |
| 种属<br>Species              | 大鼠                                                                                                                                                                                                                                                                                                                                                                                            |
| 组织来源<br>Tissue             | 心脏，心肌层                                                                                                                                                                                                                                                                                                                                                                                        |
| 形态<br>Morphology           | 成肌细胞                                                                                                                                                                                                                                                                                                                                                                                          |
| 培养特性<br>Culture Properties | 贴壁                                                                                                                                                                                                                                                                                                                                                                                            |
| 安全性<br>Safety              | 所有肿瘤和病毒转染的细胞均视为有潜在的生物危害性，必须在二级生物安全台内操作，并注意防护                                                                                                                                                                                                                                                                                                                                                  |
| 培养基<br>Culture Medium      | <b>推荐自配培养基：</b> DMEM 高糖（中乔新舟 货号： <a href="#">ZQ-100</a> ） +10%胎牛血清（中乔新舟 货号： <a href="#">ZQ500-A</a> ） +1%双抗（美国 sciencell 货号： <a href="#">0513</a> ）<br><b>配套完全培养基：</b> （中乔新舟 货号： <a href="#">ZQ-101</a> ）<br><b>温度：</b> 37°C<br><b>气相：</b> 95%空气，5%二氧化碳                                                                                                                                       |
| 细胞复苏<br>Cell Thawing       | <b>注意：</b> 1.低温保存的细胞非常脆弱，请将冻存管放入 37°C 的水浴中解冻，尽快复苏细胞。<br>2.提前室温预热培养基<br>1. 在无菌区准备好 T-25 培养瓶加入约 5ml 培养基。<br>2. 将冻存管放入 37°C 水浴中，握住冻存管晃动，直到内容物完全融化。立即将冻存管从水浴中取出，擦干并用喷洒 75%乙醇，移至无菌区。<br>3. 小心地拆卸盖子，不要碰到里面的螺纹，用移液枪轻轻吸出细胞，加入到准备好的培养瓶中。<br><b>注意：</b> 由于本公司采用 Sciencell 公司冻存液，因此不建议在解冻后进行细胞稀释和离心。<br>4. 轻轻摇动培养瓶使细胞均匀分布。如有必要，松开阀盖，以便气体交换。<br>5. 将培养瓶放入 CO <sub>2</sub> 培养箱中培养。<br>6. 过夜后，观察细胞形态并更换培养基。 |
| 传代<br>Subculturing         | 收到细胞后，请对细胞培养瓶外表进行消毒，将细胞置于培养箱中进行 1-2 小时的缓冲，待细胞恢复基本生长状态后，进行后续细胞实验。<br>在倒置显微镜下观察整个细胞生长情况：<br>（一）细胞未长至 85%时，用 75%酒精喷洒整个瓶消毒后放到生物操作台内，严格无菌操作，打开细胞培养瓶， <b>若培养瓶上无特殊标注</b> ，吸去剩余培养液，只留 6-8ml 培养液                                                                                                                                                                                                       |

|                                              |                                                                                                                                                                                                                                                                                                                                                                                                                                                                                                                                                                                                                                                                                                                                                                           |
|----------------------------------------------|---------------------------------------------------------------------------------------------------------------------------------------------------------------------------------------------------------------------------------------------------------------------------------------------------------------------------------------------------------------------------------------------------------------------------------------------------------------------------------------------------------------------------------------------------------------------------------------------------------------------------------------------------------------------------------------------------------------------------------------------------------------------------|
|                                              | <p>继续培养。</p> <p>(二) 细胞已长满 (达 85-95%)。即可进行传代, 具体步骤如下:</p> <ol style="list-style-type: none"> <li>1. 弃去培养液, 用 PBS 洗涤 1-2 次;</li> <li>2. 加入 1.0ml 胰酶消化液, 37°C 消化约 3min, 显微镜下观察细胞消化情况, 若细胞回缩变圆、透亮、轻拍瓶壁呈流沙样脱落, 则迅速拿回操作台, 加入至少双倍的完全培养液, 终止消化并轻轻吹打细胞, 使其变成单细胞悬液;</li> <li>3. 将细胞收集于离心管中离心 1000rpm/5min, 弃上清, 轻弹管底, 将细胞弹散;</li> <li>4. 加入新鲜培养基重悬细胞, 进行传代;</li> <li>5. 如果没有特别说明, 建议收到细胞后的第一次传代比例为 1:2。</li> </ol> <p><b>注: 1. 观察细胞密度最好用 (4X 物镜) 低倍镜观察, 以便正确的判断细胞密度; 观察细胞形态请用 (10X 或 20X) 高倍镜观察;</b></p> <p><b>2. 推荐使用 0.25% 胰酶/EDTA 消化液;</b></p> <p><b>3. 瓶中运输的培养液不能重复使用, 请换新鲜培养液培养;</b></p> <p><b>4. 有些细胞贴壁不牢, 如发现贴壁细胞有脱落, 可离心重悬后接种到新瓶内。</b></p>                                                                                                                                  |
| <p>保存<br/>Storage</p>                        | <p>冻存条件: 70%基础培养液+20%胎牛血清+10%DMSO</p> <p>保存条件: 液氮存储</p>                                                                                                                                                                                                                                                                                                                                                                                                                                                                                                                                                                                                                                                                                                                   |
| <p>供应限制<br/>Product Use</p>                  | <p>经供研究之用</p>                                                                                                                                                                                                                                                                                                                                                                                                                                                                                                                                                                                                                                                                                                                                                             |
| <p>常见问题及解决方案<br/>Questions and solutions</p> | <ol style="list-style-type: none"> <li>1. 在收到细胞后先观察培养瓶是否破裂, 漏液等, 如遇到上述问题请及时拍照并与我们联系。</li> <li>2. 贴壁细胞: 培养瓶不开封, 显微镜下检查细胞状态, 瓶口酒精擦拭后平躺放置在培养箱。1-2 小时后观察, 如细胞大部分又贴回瓶底, 表明细胞活力正常, 剩余少量漂浮的细胞可以去掉, 留 8-10ml 培养液培养观察, 细胞生长至汇合度到达 85% 左右, 进行消化传代; 如细胞仍不贴壁, 将细胞离心收集转到新培养瓶, 原培养瓶加部分培养液继续培养, 注意观察。如细胞仍不能贴壁, 请用台盼蓝染色鉴定细胞活力, 并请及时拍照 (多倍数多视野), 包括染色照片, 并联系我们。(以上仅为贴壁细胞处理方法)</li> <li>3. 悬浮细胞: 培养瓶不开封, 显微镜下检查细胞状态, 瓶口酒精擦拭后平躺放置在培养箱。1-2 小时后观察, 将整瓶细胞及培养液分批离心 (1000rpm, 5min), 加入适量培养基, 根据离心后的细胞量进行放回培养或分瓶培养。(以上仅为悬浮细胞处理方法)</li> <li>4. 半悬细胞: 培养瓶不开封, 显微镜下检查细胞状态, 瓶口酒精擦拭后平躺放置在培养箱。1-2 小时后观察, 将整瓶细胞培养液上层悬浮细胞离心 (1000rpm, 5min), 重悬细胞后加入原培养瓶培养至传代。细胞数量较大, 可将贴壁细胞消化下来, 与上层悬浮细胞混匀传代。重悬上层悬浮细胞时必须保持下层贴壁细胞的营养条件, 防止贴壁细胞缺乏营养。(以上仅为半悬细胞处理方法)</li> </ol> <p>如遇到细胞培养问题请及时拍照并与我们联系, 我们的技术人员会一直跟踪指导。</p> |
