# Supplementary material for: Loss of TRIM21 alleviates cardiotoxicity by suppressing ferroptosis induced by the chemotherapeutic agent doxorubicin
Source: PubMed Central journal article supplement — eBioMedicine. 2021 Jul 4;69:103456. doi: 10.1016/j.ebiom.2021.103456 (PMC8261003; doi:10.1016/j.ebiom.2021.103456), 2021-07-04

## 支原体检测报告

支原体检测反应体系:

|              |      |
|--------------|------|
| Myco-PCR-Mix | 18ul |
| 待检测细胞上清液     | 2ul  |

按照以上反应比例，在 PCR 管中将待检测样品上清液 2ul 加入到 18ul Myco-PCR-Mix 中，每次检测请用Positive control 模版作为阳性对照，用Negative control 模版作为阴性对照。PCR 反应程序为：95℃ 5min，（95℃ 30s，55℃ 45s，72℃ 45s）36 个循环，72℃ 5min，10℃ 保存。PCR 产物跑 1.5 % 琼脂胶，用DNA Marker 显示片段大小。待检测样品中如果出现与阳性对照大小一致（250 bp）的条带，说明样品被支原体感染，若无对应条带则说明无支原体污染。

跑胶结果如下图所示：

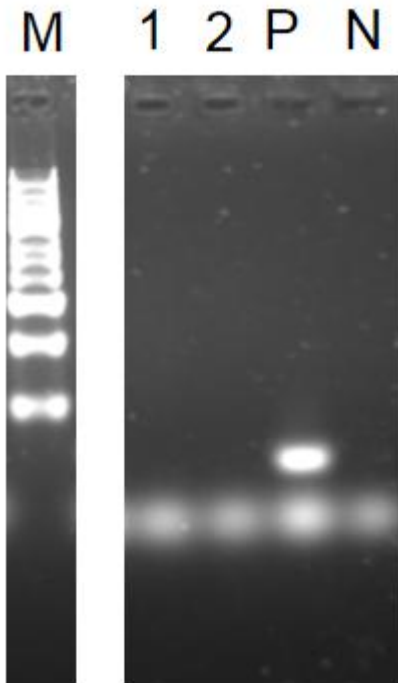

M 孔道为 DNA Marker

N 孔道为 Negative control

P 孔道为 Positive control

- 1 号孔道为待测H9C2细胞样品
- 2 号孔道为待测H9C2细胞样品复孔

细胞结论：由电泳图可知检测的H9C2细胞样品没有支原体污染

(注：图谱中样品点样孔最下方的条带是引物二聚体，是PCR检测时的常规现象，其亮暗程度通常是与阳性条带的亮度成反比的。PCR的检测方法非常灵敏，一般极弱的阳性也可以看到有区别于二聚体的条带产生，结果可靠。)

2020.01.16

检测人签名：



Supplement: mmc10.pdf [file mmc10.pdf]
