# Supplementary material for: Loss of TRIM21 alleviates cardiotoxicity by suppressing ferroptosis induced by the chemotherapeutic agent doxorubicin
Source: PubMed Central journal article supplement — eBioMedicine. 2021 Jul 4;69:103456. doi: 10.1016/j.ebiom.2021.103456 (PMC8261003; doi:10.1016/j.ebiom.2021.103456), 2021-07-04
Supplement: mmc11.pdf [file mmc11.pdf]

## Cell Line Authentication – STR Profiling Report

Sample Type: Cell Line

Testing Type: STR

Sample code:

Table 1. Sample Code

| Customer's code | Company Code |
|-----------------|--------------|
| 830             | 20210202-01  |

Sample Number: 1

Sample Type: Cell line

Testing Type: STR

Sample From: Shanghai Zhong Qiao Xin Zhou Biotechnology Co.,Ltd.

Testing Method:

DNA was extracted by a commercial kit from CORNING (AP-EMN-BL-GDNA-250G). The ten STRs including one human locus were amplified by multiplex PCR and separated on ABI 3730XL Genetic Analyzer. The signals were then analyzed by the software GeneMapper.

Data Interpretation:

Cell lines were authenticated using Short Tandem Repeat (STR) analysis as described in 2012 in ANSI Standard (ASN-0002) by the ATCC Standards Development Organization (SDO) and, mouse cell line authentication cytotechnology. 2014;66:133-147.

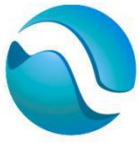

Test Results:

1. Result

Table 2. Matching information on the cell lines

| Sample Code | Multi-allele | Cell line matched | Cross contamination | EV |
|-------------|--------------|-------------------|---------------------|----|
| 20210202-01 | NO           | Rat cell line     | No                  | -  |

- Multi-allele means some STR contain more than two loci.

2. Sample Description

20210202-01:

The sample profile is Rat, but not a match for any profile, no multiple alleles and no cross contamination was found in the cell line.

### 3. QPCR Result

Table 3. Summary of test results

| Testing samples / channels | Detection channels Ct | Control Channel Ct | Result   |
|----------------------------|-----------------------|--------------------|----------|
| Human                      | undet                 | 25.24              | -        |
| Mouse                      | undet                 | 32.38              | -        |
| Rat                        | <b>24.86</b>          | 31.68              | positive |
| Negative reference         | undet                 | -                  | -        |
| Samples tested             |                       |                    | Rat      |

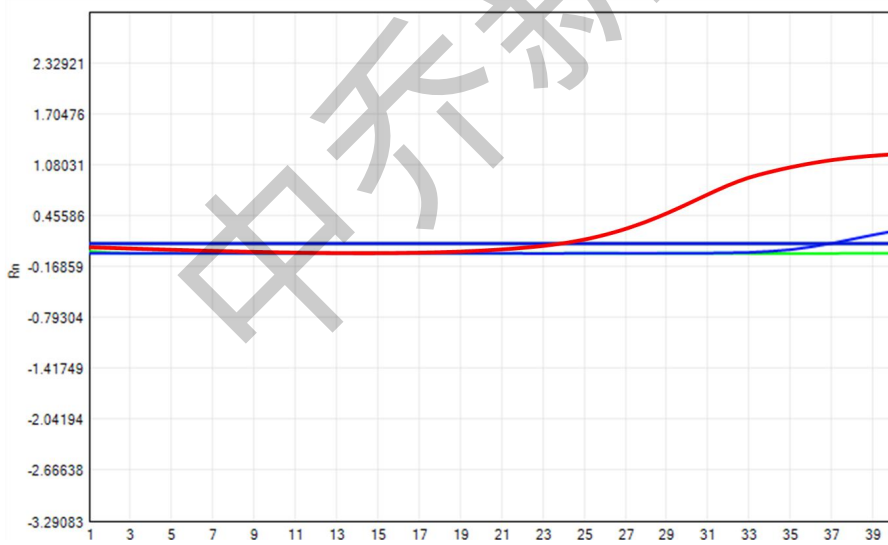

Figure.1 qPCR test results

Note: Blu -Human (Hex), Green-Mouse (FAM), Red- Rat (CY3), Blu- negative control

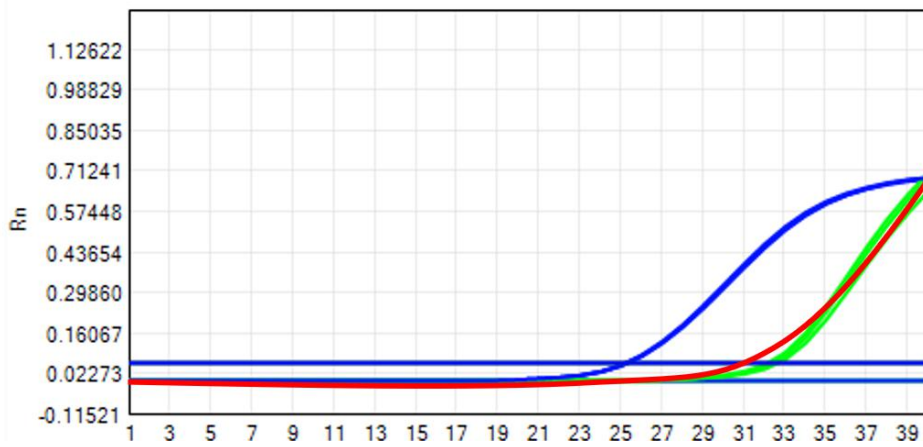

Figure.2 Comparison qPCR Test Results

Note: Blu -Human (Hex), Green-Mouse (FAM), Red- Rat (CY3), Blu- negative control

## Others:

### 1. Genotyping Strategy and Site Distribution

Attached Table. Experimental Strategy and Sites

|   | Detection channels | Control Channel | Negative channels |
|---|--------------------|-----------------|-------------------|
| 1 | Human (Hex)        | Human (Hex)     | -                 |
| 2 | Mouse (FAM)        | Mouse (FAM)     | -                 |
| 3 | Rat(CY3)           | Rat(CY3)        | -                 |

2. Cell line to be tested were compared with the cell lines in the database, which contains 2455 cell lines STR data from ATCC, DSMZ, JCRB, ECACC, GNE and RIKEN databases. If the cell is not included in the above cell library, users need to compared with other databases. D4s2408 is a human locus, which is used to detect whether the cells are contaminated by human.
