# Supplementary material for: Loss of TRIM21 alleviates cardiotoxicity by suppressing ferroptosis induced by the chemotherapeutic agent doxorubicin
Source: PubMed Central journal article supplement — eBioMedicine. 2021 Jul 4;69:103456. doi: 10.1016/j.ebiom.2021.103456 (PMC8261003; doi:10.1016/j.ebiom.2021.103456), 2021-07-04
Supplement: mmc13.pdf [file mmc13.pdf]

#### TRIM21 MEF:

TRIM21<sup>+/+</sup> and TRIM21<sup>-/-</sup> MEFs were generated by the Zong laboratory from littermate embryos, as previously described (Pan et al. 2016. Mol Cell 61:720-733. Validation of the genotype and mycoplasma test were performed in the Zong laboratory using PCR-based methods.
