# Supplementary material for: Loss of TRIM21 alleviates cardiotoxicity by suppressing ferroptosis induced by the chemotherapeutic agent doxorubicin
Source: PubMed Central journal article supplement — eBioMedicine. 2021 Jul 4;69:103456. doi: 10.1016/j.ebiom.2021.103456 (PMC8261003; doi:10.1016/j.ebiom.2021.103456), 2021-07-04
Supplement: mmc14.pdf [file mmc14.pdf]

# NQO1 Rabbit mAb

Catalog No.: A19586

Recombinant

1 Publications

## Basic Information

### Catalog No.

A19586

### Observed MW

31KDa

### Calculated MW

31kDa

### Category

Primary antibody

### Applications

WB, IHC, IP

### Cross-Reactivity

Human, Mouse, Rat

## Recommended Dilutions

|            |                |
|------------|----------------|
| <b>WB</b>  | 1:500 - 1:2000 |
| <b>IHC</b> | 1:50 - 1:200   |
| <b>IP</b>  | 1:50 - 1:200   |

## Contact

 | 400-999-6126 | [cn.market@abclonal.com.cn](mailto:cn.market@abclonal.com.cn) | [www.abclonal.com.cn](http://www.abclonal.com.cn)

## Background

This gene is a member of the NAD(P)H dehydrogenase (quinone) family and encodes a cytoplasmic 2-electron reductase. This FAD-binding protein forms homodimers and reduces quinones to hydroquinones. This protein's enzymatic activity prevents the one electron reduction of quinones that results in the production of radical species. Mutations in this gene have been associated with tardive dyskinesia (TD), an increased risk of hematotoxicity after exposure to benzene, and susceptibility to various forms of cancer. Altered expression of this protein has been seen in many tumors and is also associated with Alzheimer's disease (AD). Alternate transcriptional splice variants, encoding different isoforms, have been characterized. [provided by RefSeq, Jul 2008]

## Immunogen Information

|                |                   |
|----------------|-------------------|
| <b>Gene ID</b> | <b>Swiss Prot</b> |
| 1728           | P15559            |

### Immunogen

A synthesized peptide derived from human NQO1.

### Synonyms

DHQU;DIA4;DTD;NMOR1;NMORI;QR1;NQO1

## Product Information

|               |                |                       |
|---------------|----------------|-----------------------|
| <b>Source</b> | <b>Isotype</b> | <b>Purification</b>   |
| Rabbit        | IgG            | Affinity purification |

### Storage

Store at -20°C. Avoid freeze / thaw cycles.

Buffer: PBS with 0.02% sodium azide,0.05% BSA,50% glycerol,pH7.3.

## Validation Data

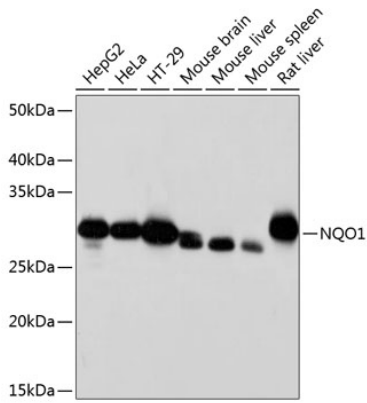

Western blot analysis of extracts of various cell lines, using NQO1 antibody (A19586) at 1:1000 dilution.

Secondary antibody: HRP Goat Anti-Rabbit IgG (H+L) (AS014) at 1:10000 dilution.

Lysates/proteins: 25ug per lane.

Blocking buffer: 3% nonfat dry milk in TBST.

Detection: ECL Basic Kit (RM00020).

Exposure time: 5s.

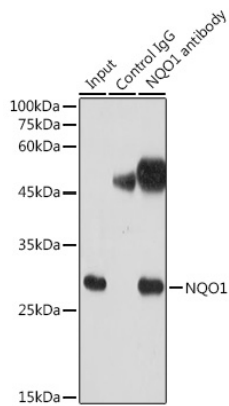

Immunoprecipitation analysis of 300ug extracts of HeLa cells using 3ug NQO1 antibody (A19586).

Western blot was performed from the immunoprecipitate using NQO1 antibody (A19586) at a dilution of 1:1000.

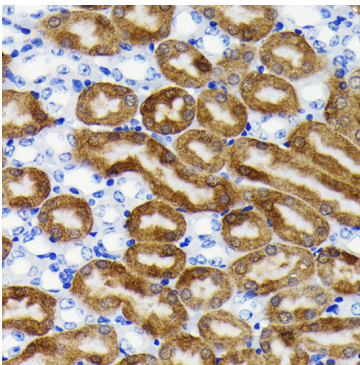

Immunohistochemistry of paraffin-embedded mouse kidney using NQO1 antibody (A19586) at dilution of 1:100 (40x lens).
