# Supplementary figures and images for: Loss of TRIM21 alleviates cardiotoxicity by suppressing ferroptosis induced by the chemotherapeutic agent doxorubicin
Source: PubMed Central journal article supplement — eBioMedicine. 2021 Jul 4;69:103456. doi: 10.1016/j.ebiom.2021.103456 (PMC8261003; doi:10.1016/j.ebiom.2021.103456), 2021-07-04

Fig.3a

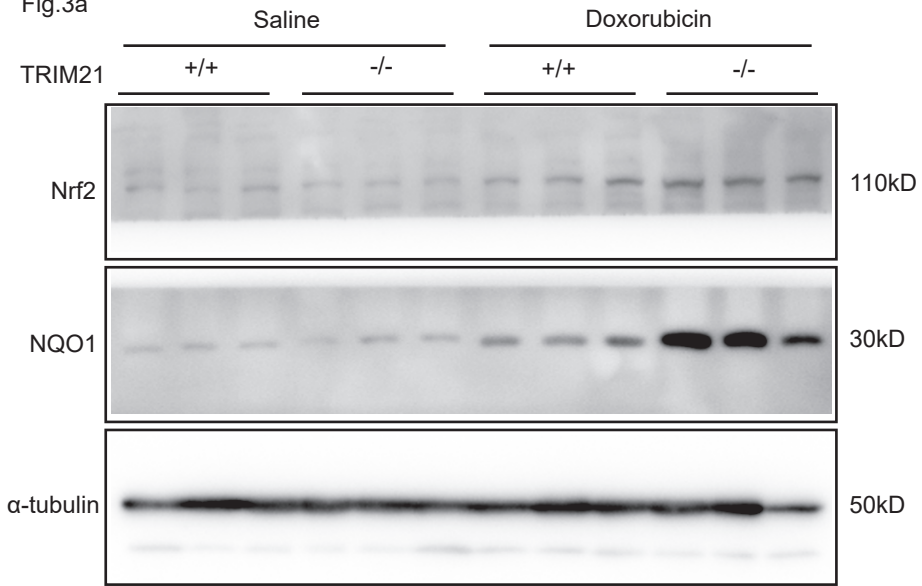

Fig.3c

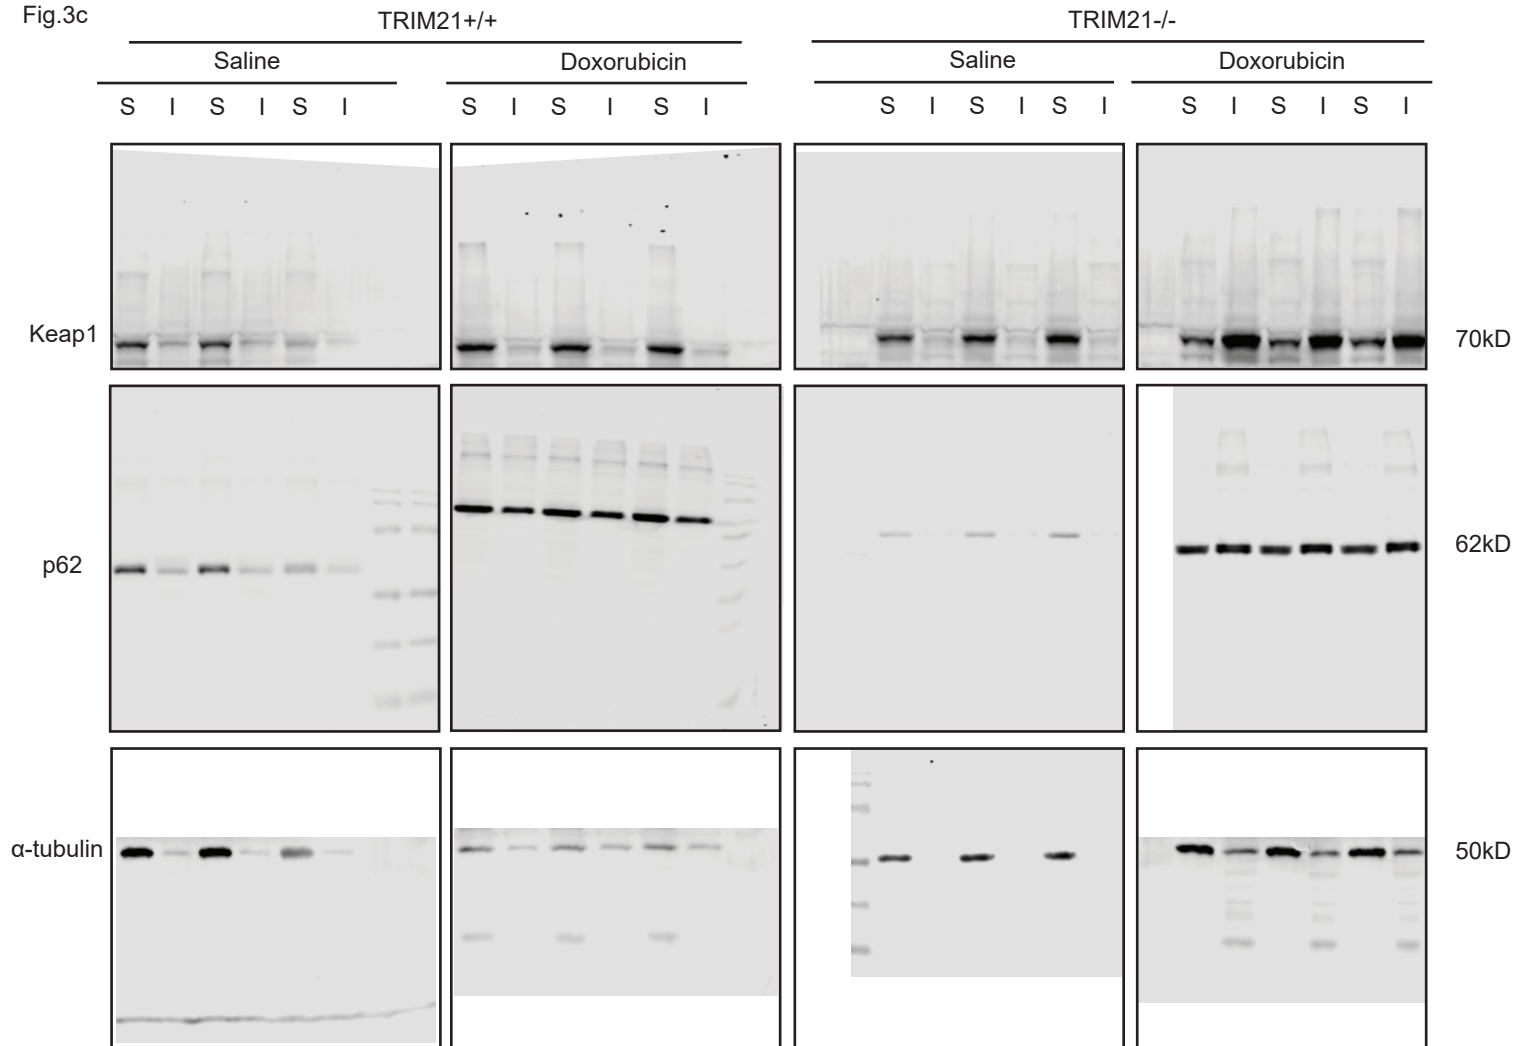

Fig.5c

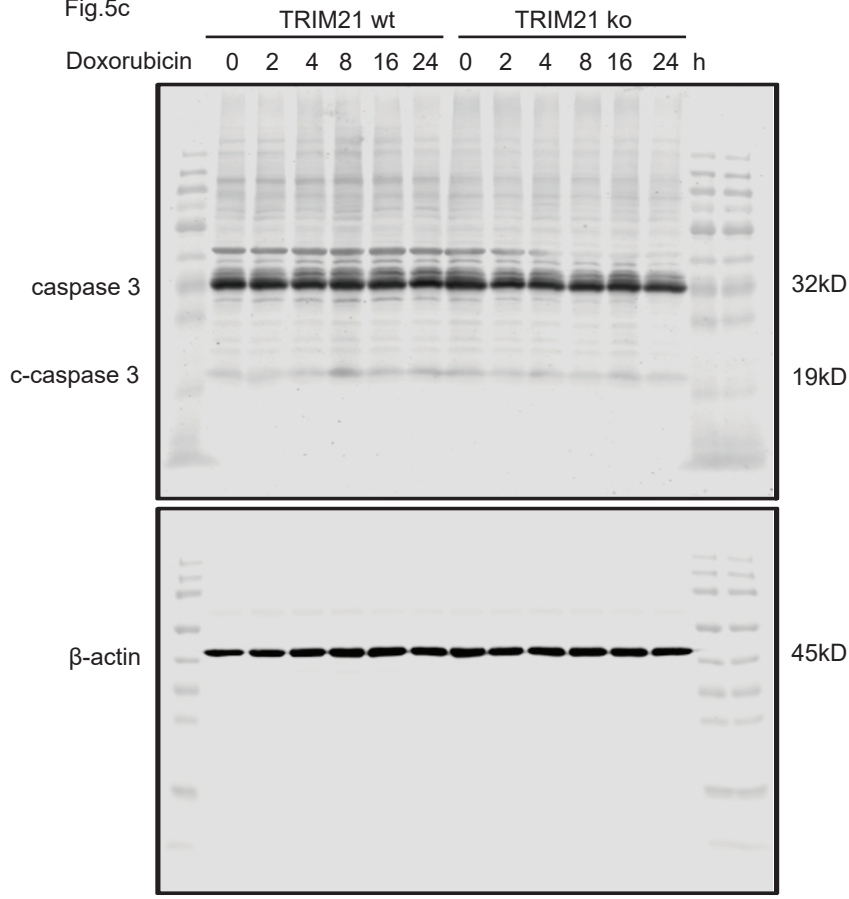

Fig.5d

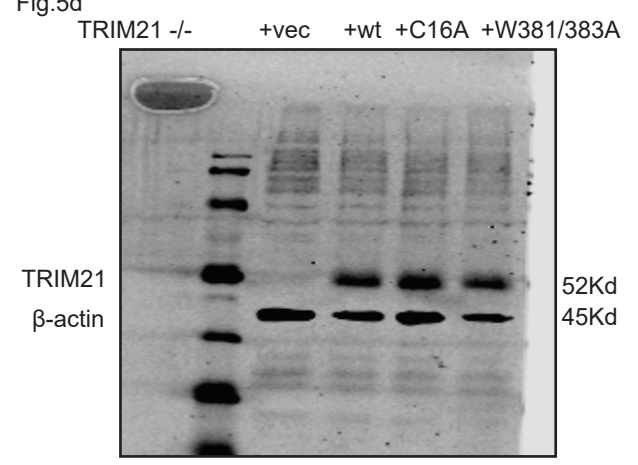

Fig.5g

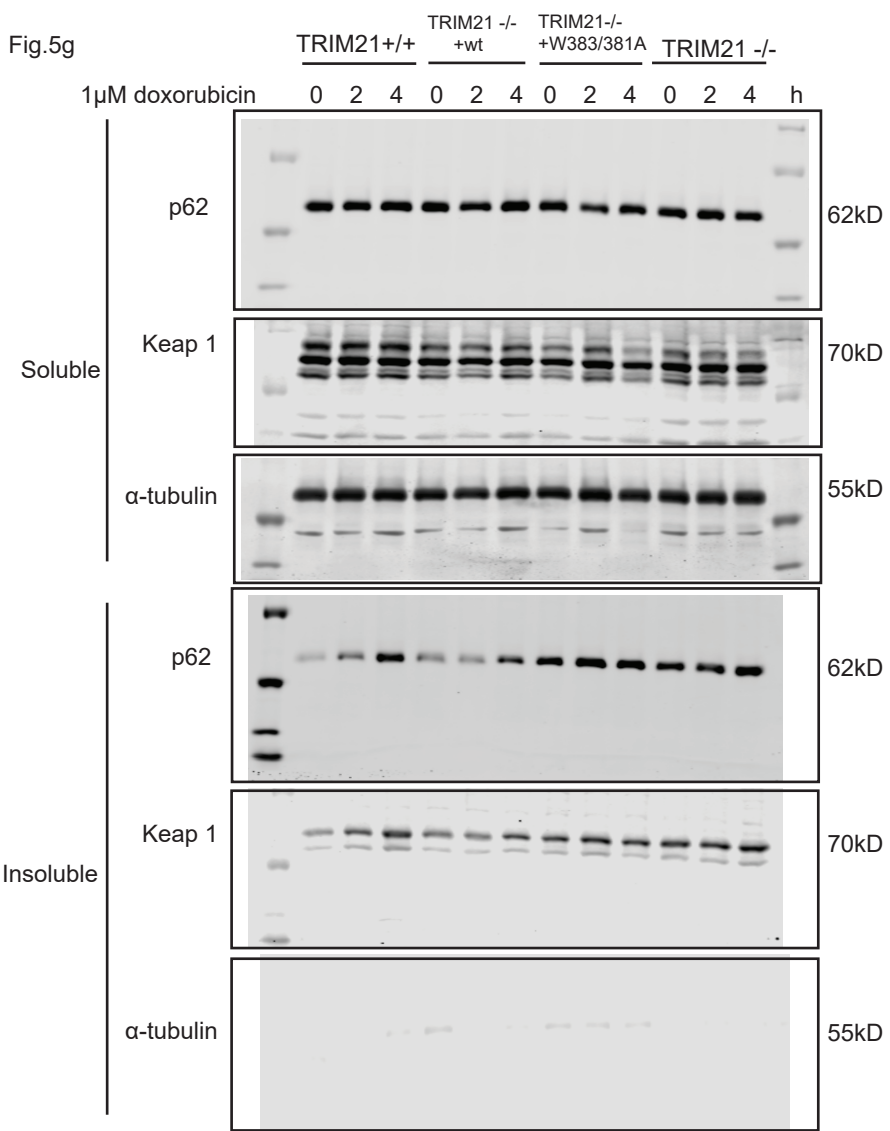

Fig.6e

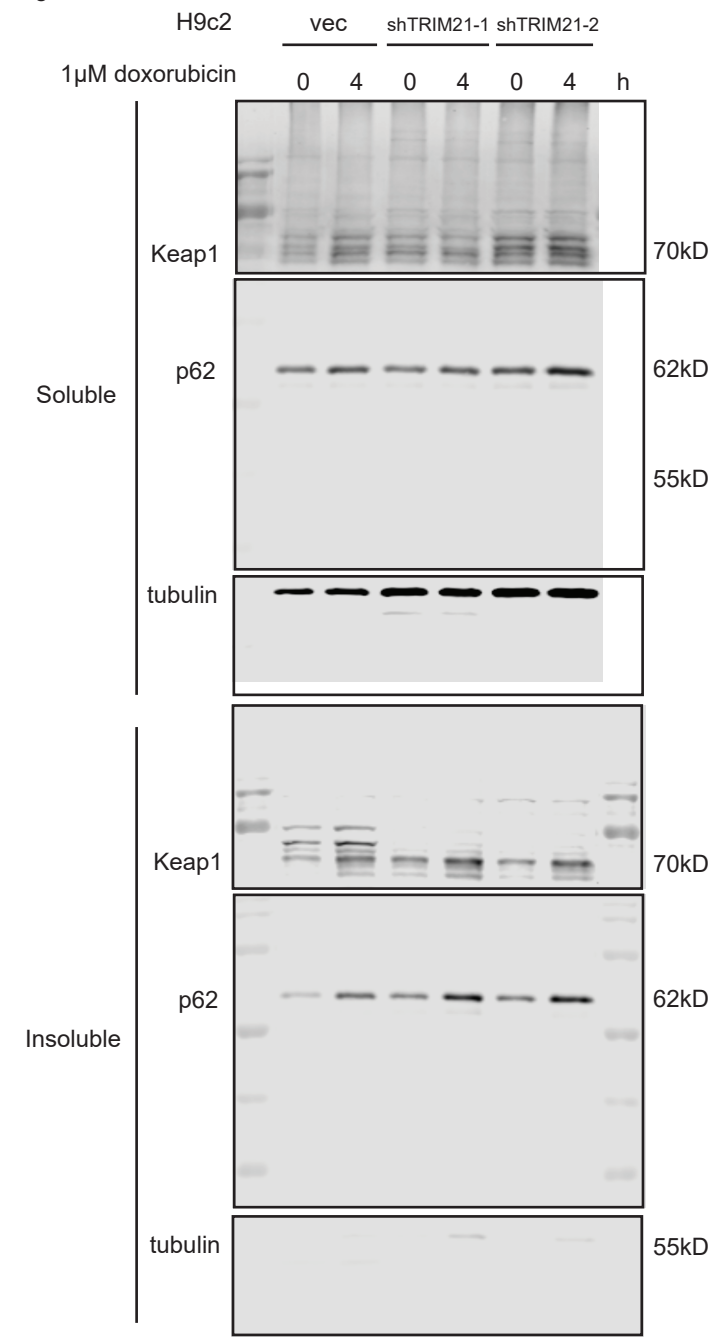



Fig. S3a

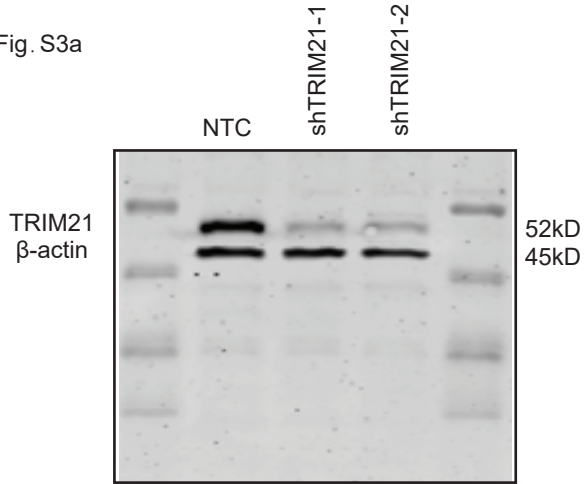

Fig. S3b

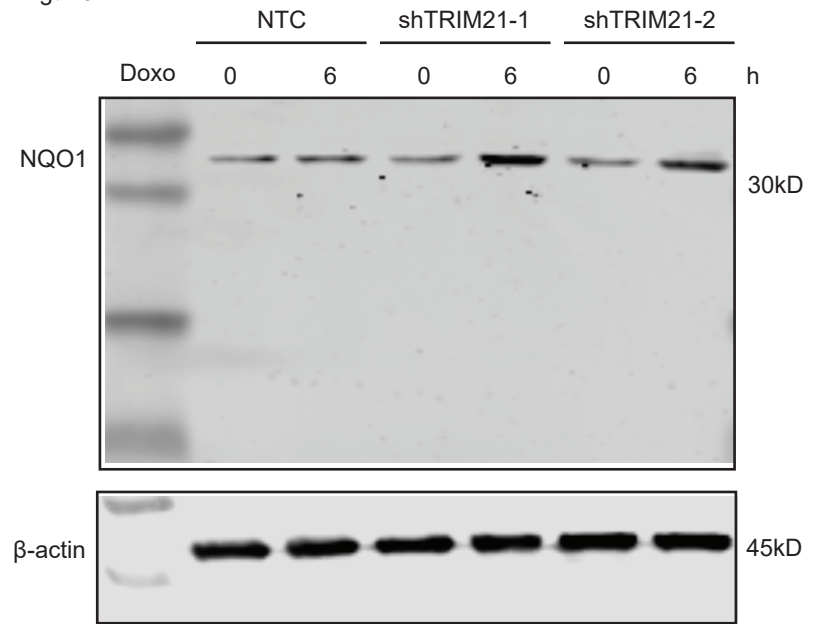

Fig.S5a

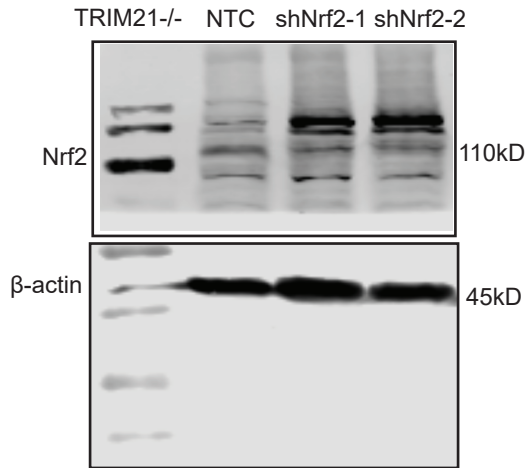

Fig.S5c

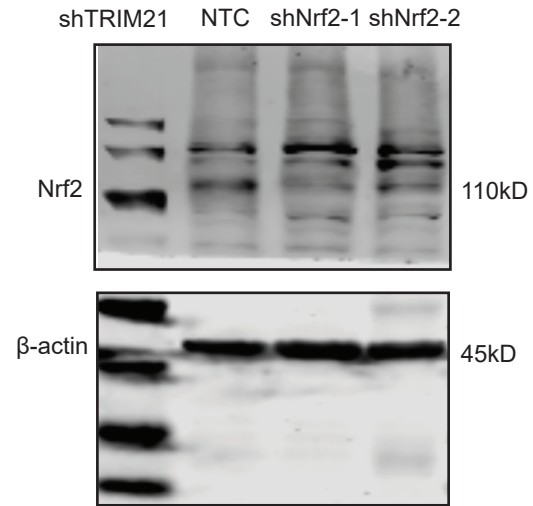

Supplement: mmc8.pdf [file mmc8.pdf]
